# Supplementary material for: Regulation of hypoxia-inducible factor-1α by NF-κB
Source: Oxford University Press journal article supplement (doi:10.1042/bj20080476), 2008-05-28
Supplement: bj4120477add.pdf [file bj4120477add.pdf]

## SUPPLEMENTARY ONLINE DATA

# Regulation of hypoxia-inducible factor-1 $\alpha$ by NF- $\kappa$ B

Patrick van UDEN<sup>1</sup>, Niall S. KENNETH<sup>1</sup> and Sonia ROCHA<sup>2</sup>

College of Life Sciences, Wellcome Trust Centre for Gene Regulation and Expression, MSI/WTB/JBC Complex, Dow Street, University of Dundee, Dundee DD1 5EH, Scotland, U.K.

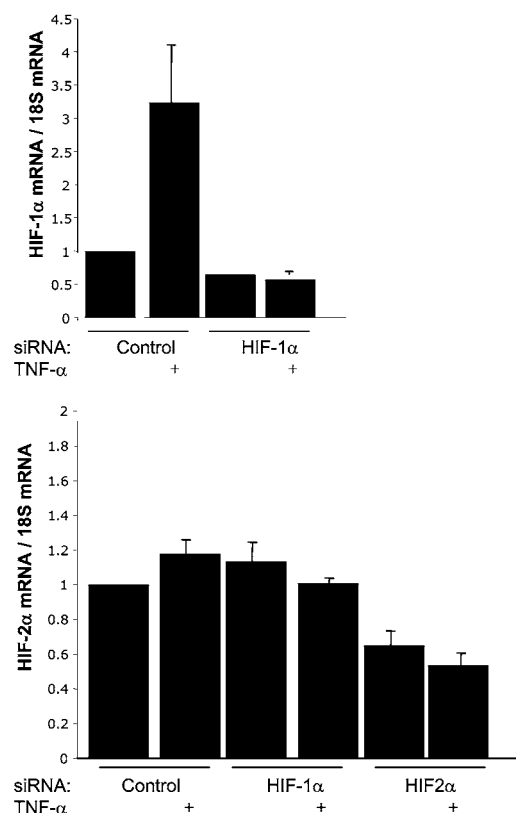

**Figure S1** HEK-293 cells were transfected with the indicated siRNA oligonucleotides and HIF-1 $\alpha$  and HIF-2 $\alpha$  mRNA was analysed by qRT-PCR

The histogram depicts relative levels of specific mRNA transcripts normalized to 18S mRNA levels. The mean  $\pm$  S.D. were calculated from a minimum of three independent experiments.

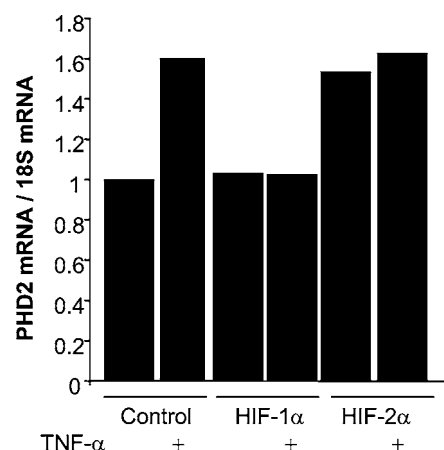

**Figure S2** HEK-293 cells were transfected with the indicated siRNA oligonucleotides and PHD2 mRNA was analysed by qRT-PCR

The histogram depicts relative levels of specific mRNA transcripts normalized to 18S mRNA levels. Results are representative of a minimum of three independent experiments.

Received 29 February 2008/3 April 2008; accepted 4 April 2008

Published as BJ Immediate Publication 4 April 2008, doi:10.1042/BJ20080476

<sup>1</sup> These authors contributed equally to this work.

<sup>2</sup> To whom correspondence should be addressed (email s.rocha@dundee.ac.uk).
